# Supplementary material
Source: publisher figshare collection journal article supplement (https://wiley.figshare.com/articles/dataset/_/3568452)
Supplement: Supplementary file 1 [file 1 › appendix-A.htm]

Ecological Archives M084-006-A1


*Ecological Archives* M084-006-A1

David C. Forney, Daniel H. Rothman. 2014. Carbon transit through degradation networks. *Ecological Monographs* 84:109–129. http://dx.doi.org/10.1890/12-1846.1

Appendix A. Detailed solution to the two-state example problem.

> View / download PDF.


---

[Back to M084-006]
