# Supplementary material
Source: publisher figshare collection journal article supplement (https://wiley.figshare.com/articles/dataset/_/3568452)
Supplement: Supplementary file 1 [file 1 › appendix-A.pdf]

## A Detailed solution to the two-state example problem

The solution to (4) is readily found by assuming solutions exist of the form

$$\mathbf{x}(t) = \begin{bmatrix} u_1 \\ u_2 \end{bmatrix} e^{-\lambda t}. \quad (\text{A.1})$$

Substituting (A.1) for  $\mathbf{x}$  in equation (4) results in the eigenvalue problem

$$-\lambda \begin{bmatrix} u_1 \\ u_2 \end{bmatrix} = \begin{bmatrix} -k_1 & 0 \\ f k_1 & -k_2 \end{bmatrix} \begin{bmatrix} u_1 \\ u_2 \end{bmatrix} \quad (\text{A.2})$$

which, after subtracting the left hand side from both sides of (A.2) is

$$\begin{bmatrix} 0 \\ 0 \end{bmatrix} = \begin{bmatrix} -k_1 + \lambda & 0 \\ f k_1 & -k_2 + \lambda \end{bmatrix} \begin{bmatrix} u_1 \\ u_2 \end{bmatrix} \quad (\text{A.3})$$

However, there are only a few possible values of the eigenvalues  $\lambda$  and eigenvectors  $\mathbf{u}$  which can satisfy (A.3). This occurs when the matrix is singular and its determinant is zero, providing the characteristic equation

$$(-k_1 + \lambda)(-k_2 + \lambda) = 0, \quad (\text{A.4})$$

which has the two solutions

$$\lambda_1 = k_1 \quad (\text{A.5})$$

$$\lambda_2 = k_2. \quad (\text{A.6})$$

The directions of the eigenvectors  $\mathbf{u}_1$  and  $\mathbf{u}_2$  are found by plugging  $\lambda_1$  and  $\lambda_2$  into (A.3).

The solution  $\mathbf{x}$  is a superposition of both exponential decays,

$$\mathbf{x} = \alpha_1 \mathbf{u}_1 e^{-\lambda_1 t} + \alpha_2 \mathbf{u}_2 e^{-\lambda_2 t} \quad (\text{A.7})$$

which is

$$\begin{bmatrix} x_1 \\ x_2 \end{bmatrix} = \alpha_1 \begin{bmatrix} k_2 - k_1 \\ f k_1 \end{bmatrix} e^{-\lambda_1 t} + \alpha_2 \begin{bmatrix} 0 \\ 1 \end{bmatrix} e^{-\lambda_2 t} \quad (\text{A.8})$$

The weights  $\alpha$  for each eigenvector are determined by substituting the initial condition  $\mathbf{x}(0)$  into (A.7) at  $t = 0$ , resulting in the system of equations

$$\begin{bmatrix} x_1(0) \\ x_2(0) \end{bmatrix} = \begin{bmatrix} \mathbf{u}_1 & \mathbf{u}_2 \end{bmatrix} \begin{bmatrix} \alpha_1 \\ \alpha_2 \end{bmatrix}. \quad (\text{A.9})$$

The solution to (A.9) is

$$\alpha_1 = \frac{1}{k_2 - k_1} x_1(0) \quad (\text{A.10})$$

$$\alpha_2 = x_2(0) - \frac{f k_1}{k_2 - k_1} x_1(0) \quad (\text{A.11})$$

The total mass of the system,  $G(t) = x_1(t) + x_2(t)$  therefore decays as

$$G = r_1 e^{-\lambda_1 t} + r_2 e^{-\lambda_2 t} \quad (\text{A.12})$$

where, as seen from (A.8)

$$\begin{bmatrix} r_1 \\ r_2 \end{bmatrix} = \begin{bmatrix} \sum_i u_{1,i} & 0 \\ 0 & \sum_i u_{2,i} \end{bmatrix} \begin{bmatrix} \alpha_1 \\ \alpha_2 \end{bmatrix}. \quad (\text{A.13})$$

Solving (A.13) provides the estimates of the mass fractions  $r_1$  and  $r_2$  in eigenspace

$$r_1 = x_1(0) \left( 1 + \frac{f k_1}{k_2 - k_1} \right), \quad (\text{A.14})$$

$$r_2 = x_2(0) - x_1(0) \frac{f k_1}{k_2 - k_1}. \quad (\text{A.15})$$
